# Supplementary material
Source: PubMed Central journal article supplement (PMC3123076)
Supplement: supp_M111.233304_jbc.M111.233304-1.pdf [file supp_M111.233304_jbc.M111.233304-1.pdf]

## Supplementary Figure Legend

### **Figure S1. Cell surface gC1qR is recruited to the lamellipodia of motile A549 cells.**

**A.** Colocalization of gC1qR with lamellipodia markers, such as CD44, p-FAK (Y397), GM1, and actin in lamellipodia. Nonconfluent A549 cells were serum-starved and stimulated with serum or various growth factors as indicated in Figure 1B. The cellular localization of gC1qR, CD44, and p-FAK was determined after permeabilization by immunofluorescence using anti-gC1qR, anti-CD44, and anti-p-FAK antibodies. Rhodamine-conjugated CTB and phalloidin were used for the localization of GM1, and actin, respectively. Scale bar = 20  $\mu\text{m}$ .

**B.** The surface coexpression of gC1qR with CD44 in lamellipodia. Nonconfluent A549 cells were serum-starved and stimulated with serum or various growth factors as indicated in Figure 1B. The surface expression of gC1qR and CD44 was determined in nonpermeabilized cells by immunofluorescence. Scale bar = 20  $\mu\text{m}$ .

### **Figure S2. Knockdown of gC1qR prevents growth factor-induced lamellipodia formation.**

**A-C.** After 18 hrs of serum starvation, sh-con and sh-gC1qR cells were stimulated with serum or growth factors as indicated in Figure 1B. After permeabilization, cellular co-localization of gC1qR with CD44 (A), actin (B) or GM1 (C) was determined by immunofluorescence for gC1qR and CD44 and by staining with rhodamine-conjugated phalloidin and CTB. Scale bar = 20  $\mu\text{m}$ .

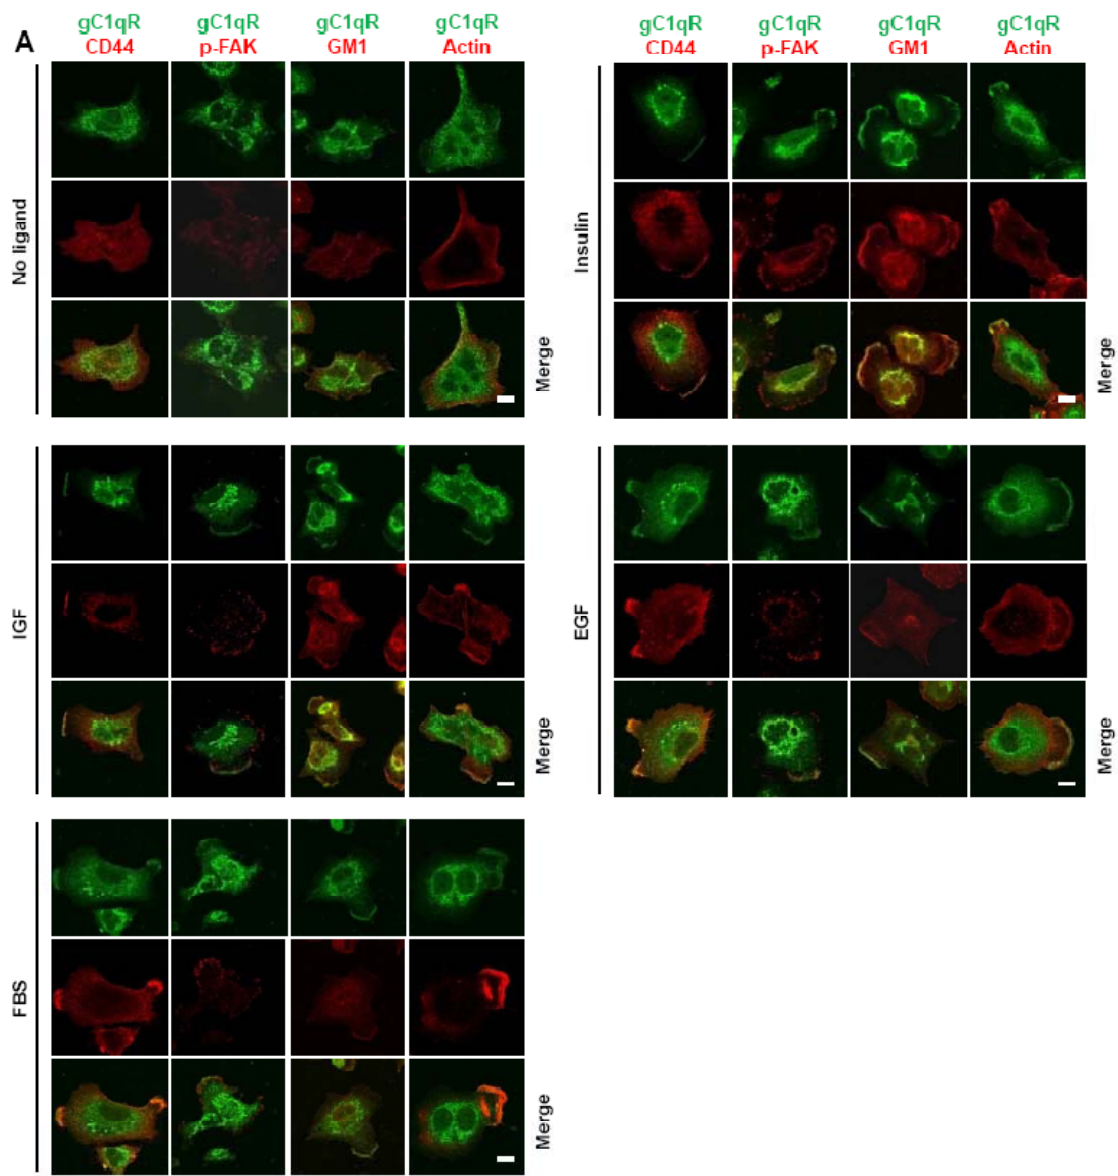

Kim et al., Figure S1A

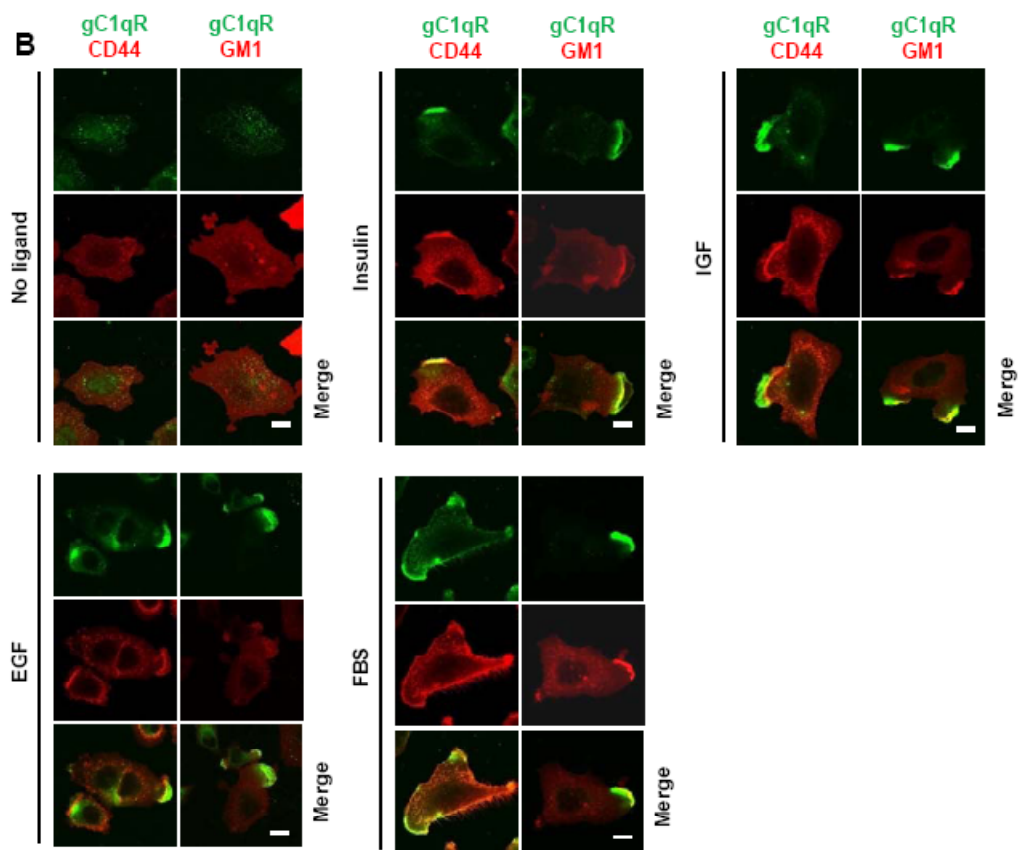

Kim et al., Figure S1B

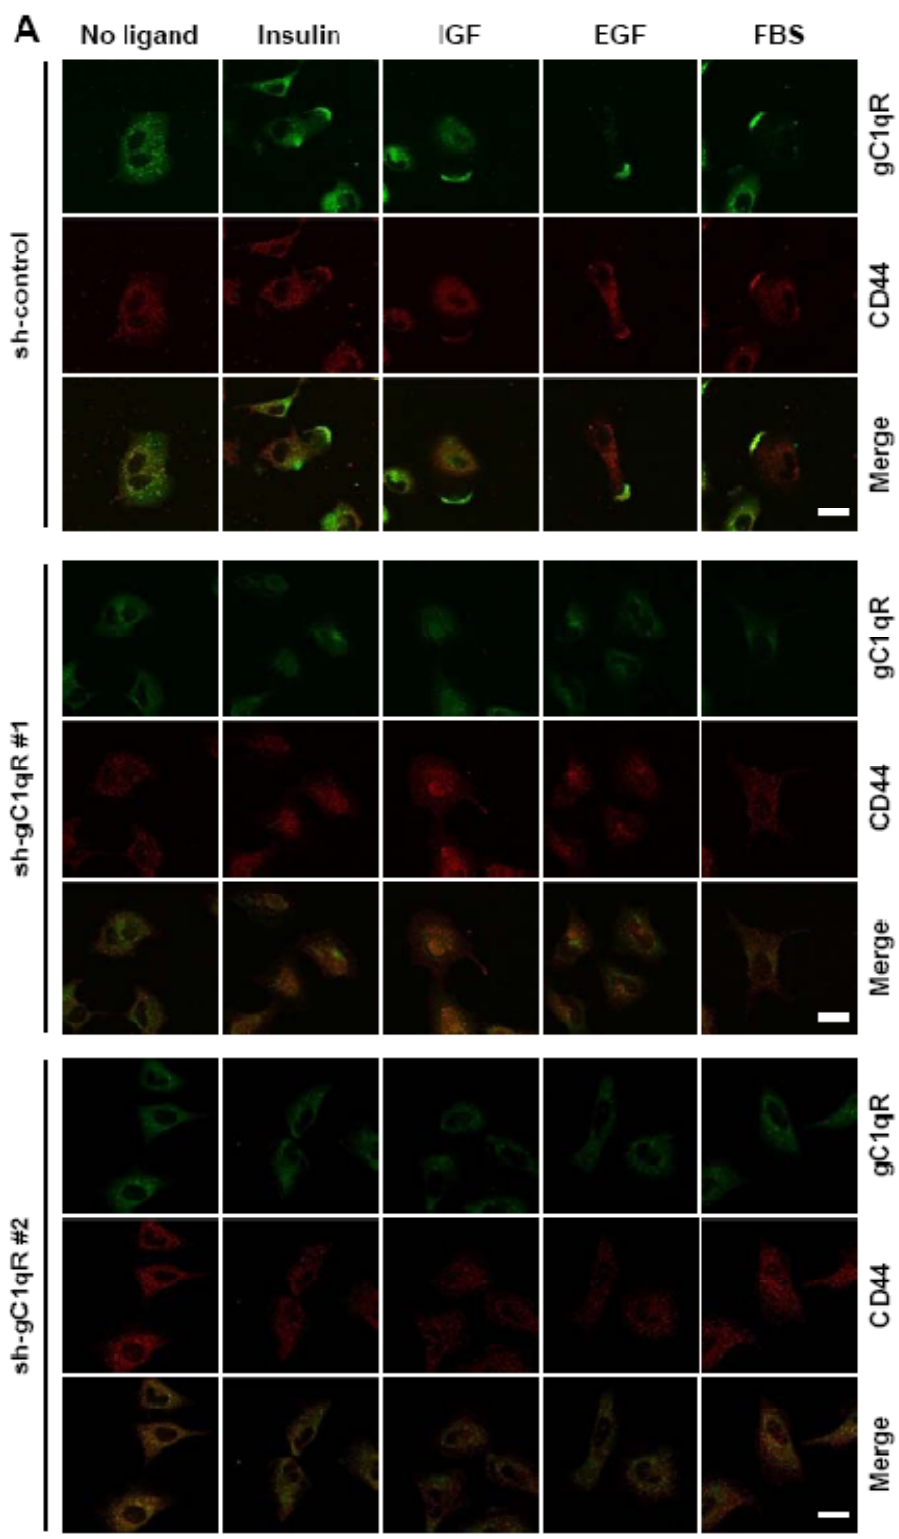

Kim et al., Figure S2A

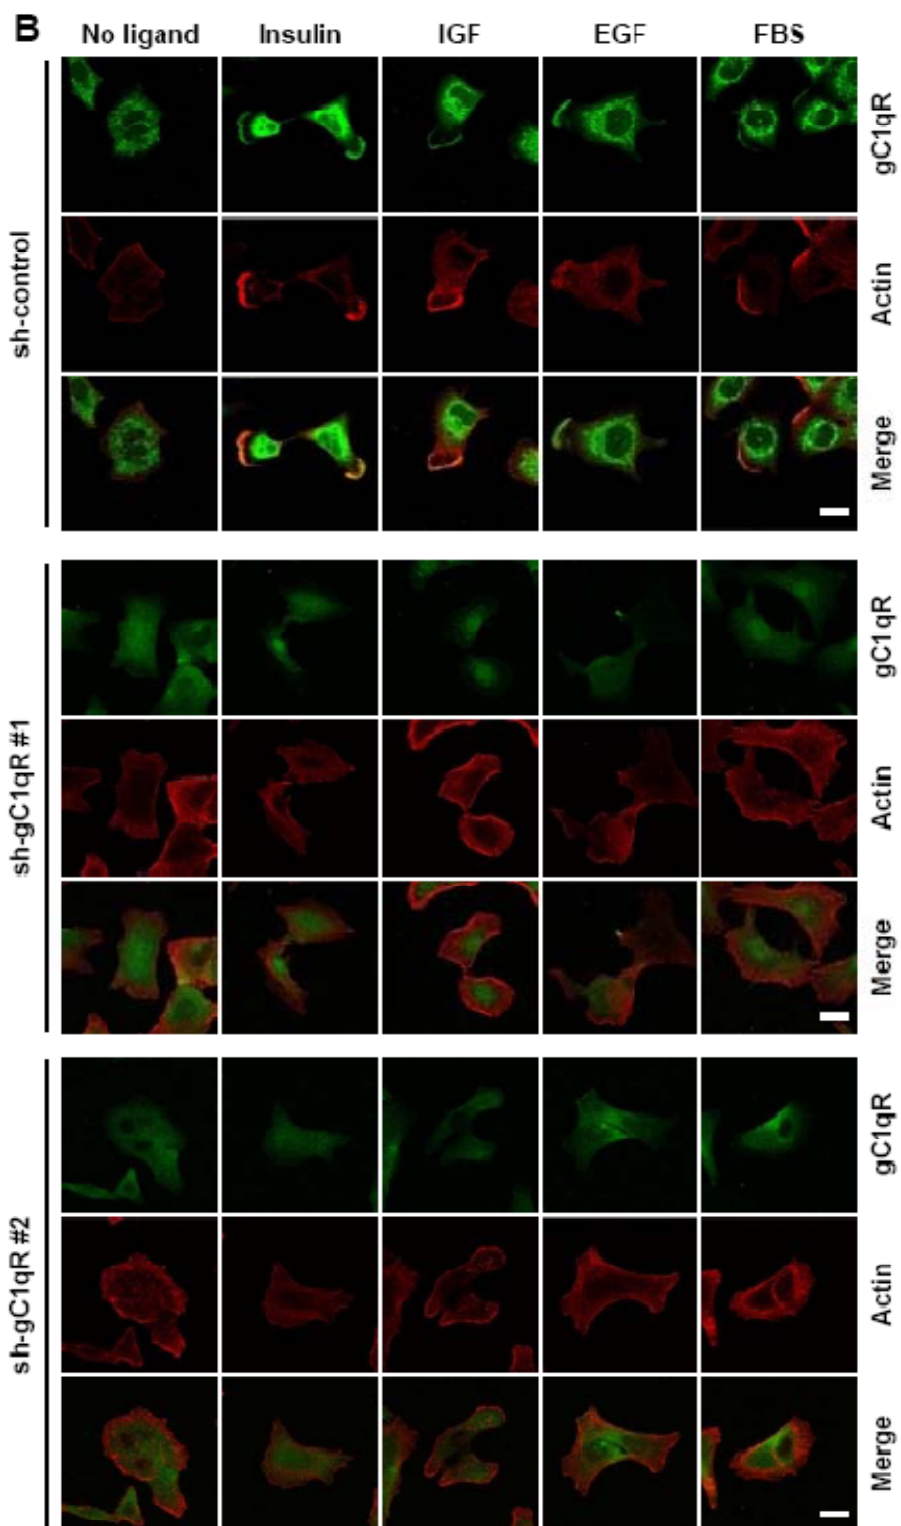

Kim et al., Figure S2B

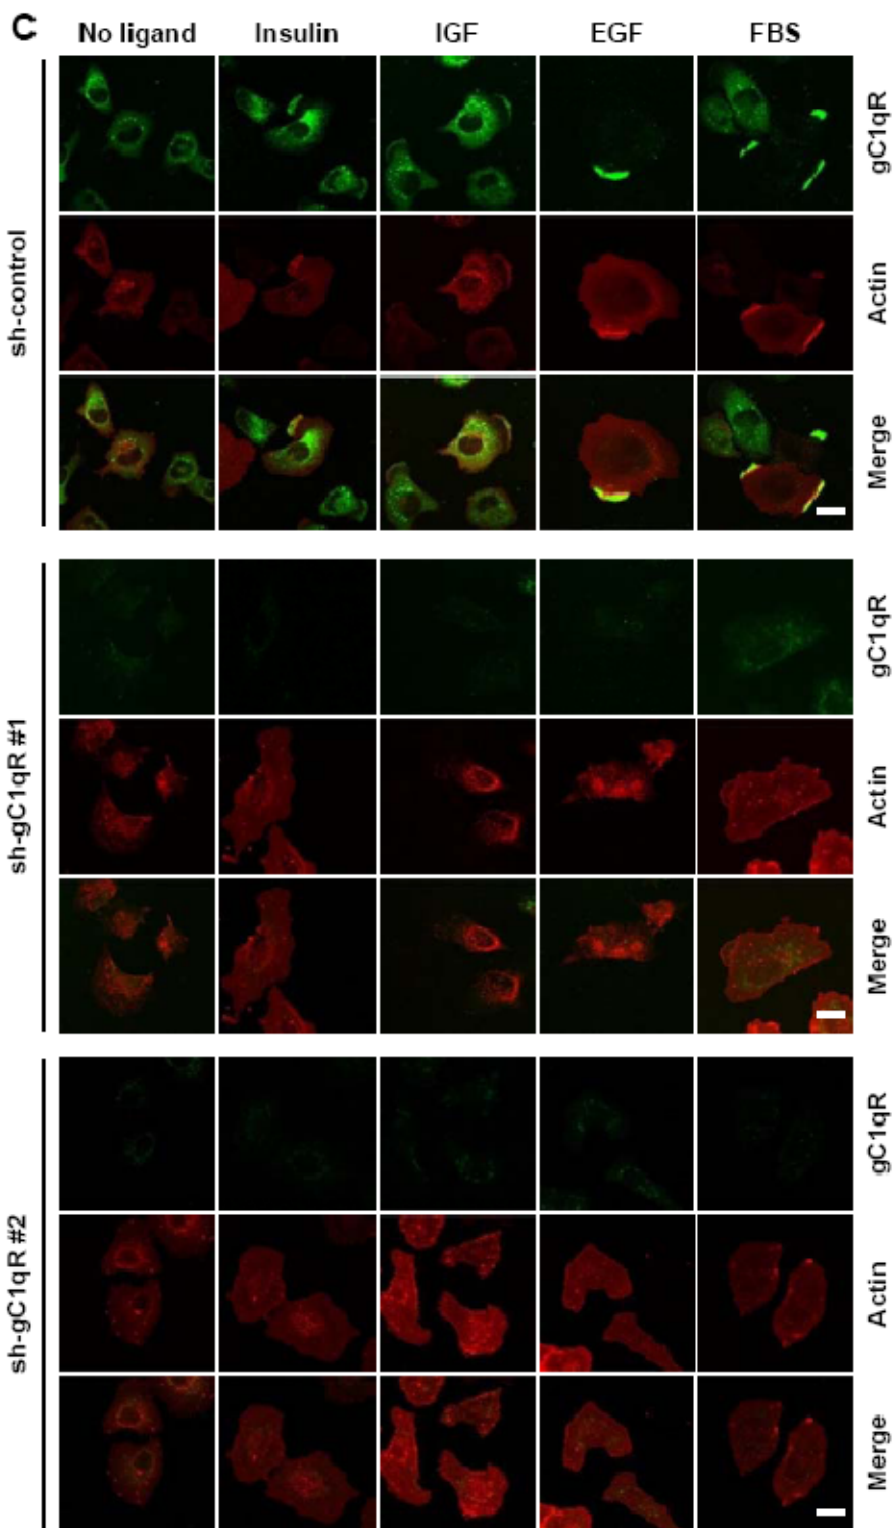

Kim et al., Figure S2C
